# Supplementary material for: Upregulation of C4 characteristics does not consistently improve photosynthetic performance in intraspecific hybrids of a grass
Source: PubMed Central journal article supplement (PMC9314825; doi:10.1111/pce.14301), 2022-03-10
Supplement: PCE-45-1398-s005.pdf [file PCE-45-1398-s005.pdf]

Supplementary information for:

## **Upregulation of C<sub>4</sub> characteristics does not consistently improve photosynthetic performance in intraspecific hybrids of a grass**

Matheus E. Bianconi, Graciela Sotelo, Emma V. Curran, Vanja Milenkovic, Emanuela Samaritani, Luke T. Dunning, Lígia T. Bertolino, Colin P. Osborne, Pascal-Antoine Christin

This supplementary information contains 9 figures and 12 tables. Tables are provided in five separate files: Tables S1-S6, S10-S12 (“Tables\_SI.xlsx”) and separate XLSX files for Tables S7, S8, S9 and S10.

**Fig. S1.** Leaf anatomical variables measured in this study.

**Fig. S2.** Principal component analysis on 11,988 genes from the chromosome-level genome assembly of *Alloteropsis semialata*.

**Fig. S3.** Transcript abundance in reads per million (RPM) of selected genes encoding core C<sub>4</sub> enzymes in *Alloteropsis semialata*: (A) aspartate aminotransferase (ASP-AT, gene *aspat-3P4*), (B) NADP-dependent malic enzyme (NADP-ME, gene *nadpme-1P4*), (C) phosphoenolpyruvate carboxykinase (PCK, gene *pck1P1\_LGT*), (D) pyruvate phosphate dikinase (PPDK, gene *ppdk-1P2*), and (E-I) phosphoenolpyruvate carboxylase (PEPC) genes. Transcript abundance computed for *A. semialata* samples extracted from Dunning et al. (2019a) are shown on the right for each gene.

**Fig. S4.** Transcript abundance of selected gene families with a role in photorespiration (A-K), and the gene encoding the transcription factor GOLDEN2-like (L) in F1 hybrids and the parental photosynthetic types in *Alloteropsis semialata*. (A) 2-phosphoglycolate (2-PG) phosphatase (PGLP), (B-C) flavin mononucleotide (FMN)-dependent glycolate oxidase (GOX), (D) glutamate:glyoxylate aminotransferase (GGT), (E-H) glycine decarboxylase (GDC) complex proteins -H, -P, -T and -L, (I-J) serine hydroxymethyltransferase (SHMT), (K) glycerate 3-kinase (GLYK). Transcript abundance in reads per million mapped reads (RPM).

**Fig. S5.** Heat map of differentially expressed genes related to C<sub>4</sub> photosynthesis and photorespiration. Asterisks indicate significant DE genes ( $p < 0.05$ ) for comparisons between hybrid types (C<sub>3</sub> x C<sub>4</sub> vs C<sub>3</sub>+C<sub>4</sub> x C<sub>4</sub>) and between each hybrid type and the C<sub>4</sub> type. Only DE genes with at least two-fold change and base count > 500 are shown. Count data was transformed using the VST function of DESeq2 and scaled by row. See table S9 for full gene annotation

**Fig. S6.** Photosynthetic response to intercellular CO<sub>2</sub> ( $A/C_i$ ) of F1 hybrids and the parental photosynthetic types in *Alloteropsis semialata*. Panels contain all  $A/C_i$  curves collected for each accession, with individual curves coloured with different shades of grey. Accession name and

cross/photosynthetic type are indicated on the top left. Vertical dashed lines indicate the CO<sub>2</sub> compensation point of each curve.

**Fig. S7.** Leaf stomata variables. (A) Steady-state stomatal conductance ( $g_s$ ) at 400  $\mu\text{mol mol}^{-1}$  ( $n = 2\text{-}4$  leaves per accession). (B) Stomatal density on the abaxial side of the leaves ( $n = 2$  leaves per accession, with stomata counts averaged from 5 fields per leaf; field area = 0.38 mm<sup>2</sup>). Data points on the right are the means per accession within each cross/photosynthetic type, and different lower-case letters indicate statistical differences between groups (ANOVA,  $p < 0.05$  post-hoc Tukey HSD;  $n \geq 3$ ).

**Fig. S8.** Leaf temperature variation during  $A/C_i$  curves. Data points are individual  $A/C_i$  measurements for each plant (left panels) or with individuals grouped into cross/photosynthetic types (right panels). (A) All measurements, and measurements collected at reference CO<sub>2</sub> (B)  $< 100 \mu\text{mol mol}^{-1}$ , (C) between 100 and 400  $\mu\text{mol mol}^{-1}$ , and (D)  $> 400 \mu\text{mol mol}^{-1}$ . Arrows indicate outlier individuals that were removed for the analysis in Fig. S9.

**Fig. S9.** Photosynthetic performance of F1 hybrids and the parental photosynthetic types in *Alloteropsis semialata* after removing outlier accessions (i.e. with  $T_{\text{leaf}} 1^\circ\text{C}$  above the median). (A) Maximum carboxylation efficiency (CE), (B) CO<sub>2</sub> compensation point (CCP), and steady-state (C) net photosynthetic rate ( $A_{400}$ ), and (D) intrinsic water use efficiency (iWUE,  $A/g_s$ ) at reference CO<sub>2</sub> = 400  $\mu\text{mol mol}^{-1}$ .

**Table S1.** Sample information.

**Table S2.** Genotyping using PCR/Sanger-sequencing.

**Table S3.** List of primer sequences used for genotyping.

**Table S4.** RNA-seq markers selected for genotyping analysis I (photosynthetic type).

**Table S5.** RNA-seq markers selected for genotyping analysis II (pollen parent).

**Table S6.** Raw leaf anatomy data.

**Table S7.** Normalized transcript abundance for the co-ortholog gene set.

**Table S8.** Normalized transcript abundance for the *A. semialata* complete genome gene set.

**Table S9.** Differential expression analysis between F1 hybrids and the C<sub>4</sub> parental type.

**Table S10.** Gene ontology enrichment analyses on genes differentially expressed between F1 hybrids and the C<sub>4</sub> parental type.

**Table S11.** Raw  $A/C_i$  data.

**Table S12.** Estimated photosynthetic parameters and steady-state measurements.

## Supplementary Methods

### *Global transcriptome analyses*

We performed differential expression (DE) analyses using the raw counts obtained after mapping the RNA-seq datasets to the coding sequences extracted from the chromosome-level genome assembly of *A. semialata* (Dunning et al. 2019; see main text; total number of genes = 45,145). To detect genes that were differentially expressed between each of the hybrid types and the parental types, we used the R package *DESeq2* (Love et al. 2014). Due to the lack of sufficient replicates for the C<sub>3</sub> and C<sub>3</sub>+C<sub>4</sub> parental types, we restricted our analyses to the comparisons between hybrid types (C<sub>3</sub> x C<sub>4</sub> vs C<sub>3</sub>+C<sub>4</sub> x C<sub>4</sub>), and between each of these and the C<sub>4</sub> type. Only genes with more than 10 counts across all accessions were retained for the DE analysis (total = 29,200 genes). For each comparison, we used a false discovery rate (FDR) of 0.05 as cut-off value. We then investigated whether each of the sets of DE genes were associated with any particular metabolic function using a gene ontology (GO) enrichment analysis with the R package *clusterProfiler* (Yu et al. 2012). We first used Orthofinder v2.5.2 (Emms and Kelly 2019) with default parameters to identify the corresponding orthologs of *A. semialata* in the closely related grass species *Setaria italica* (v2.2), *Sorghum bicolor* (v3.1.1) and *Oryza sativa* (v7.0; genomes extracted from Phytozome v13; Goodstein et al. 2012). We extracted the GO annotations for the three genomes using the Biomart tool of Phytozome 13, and transferred the annotations to the *A. semialata* gene set using the orthology information obtained from Orthofinder. We then performed a GO enrichment analysis on the DE gene set resulting from each of the three comparisons using the *enricher* function of *clusterProfiler* with a *p*-value cut-off of 0.05. The identity of C<sub>4</sub>- and photorespiration-related genes in the genome of *A. semialata* was extracted from the annotations used in Bianconi et al. (2018) and Dunning et al. (2019).

### Supplementary References

- Bianconi ME, Dunning, LT, Moreno-Villena JJ, Osborne CP, Christin PA. 2018.** Gene duplication and dosage effects during the early emergence of C<sub>4</sub> photosynthesis in the grass genus *Alloteropsis*. *Journal of Experimental Botany*, 69, 1967–1980.
- Dunning LT, Olofsson JK, Parisod C, Choudhury RR, Moreno-Villena JJ, Yang Y, Dionora J, Paul Quick W, Park M, Bennetzen JL, et al. 2019.** Lateral transfers of large DNA fragments spread functional genes among grasses. *Proceedings of the National Academy of Sciences, USA* 116: 4416–4425.
- Emms DM, Kelly S. 2019.** OrthoFinder: Phylogenetic orthology inference for comparative genomics. *Genome Biology* 20: 238.

- Goodstein DM, Shu S, Howson R, Neupane R, Hayes RD, Fazo J, Mitros T, Dirks W, Hellsten U, Putnam N, et al. 2012.** Phytozome: A comparative platform for green plant genomics. *Nucleic Acids Research* 40: D1178–D1186.
- Love MI, Huber W, Anders S. 2014.** Moderated estimation of fold change and dispersion for RNA-seq data with DESeq2. *Genome Biology*, **15**, 550.
- Yu G, Wang L, Han Y, He Q. 2012.** clusterProfiler: an R package for comparing biological themes among gene clusters. *OMICS: A Journal of Integrative Biology*, 16, 284-287.

Fig. S1

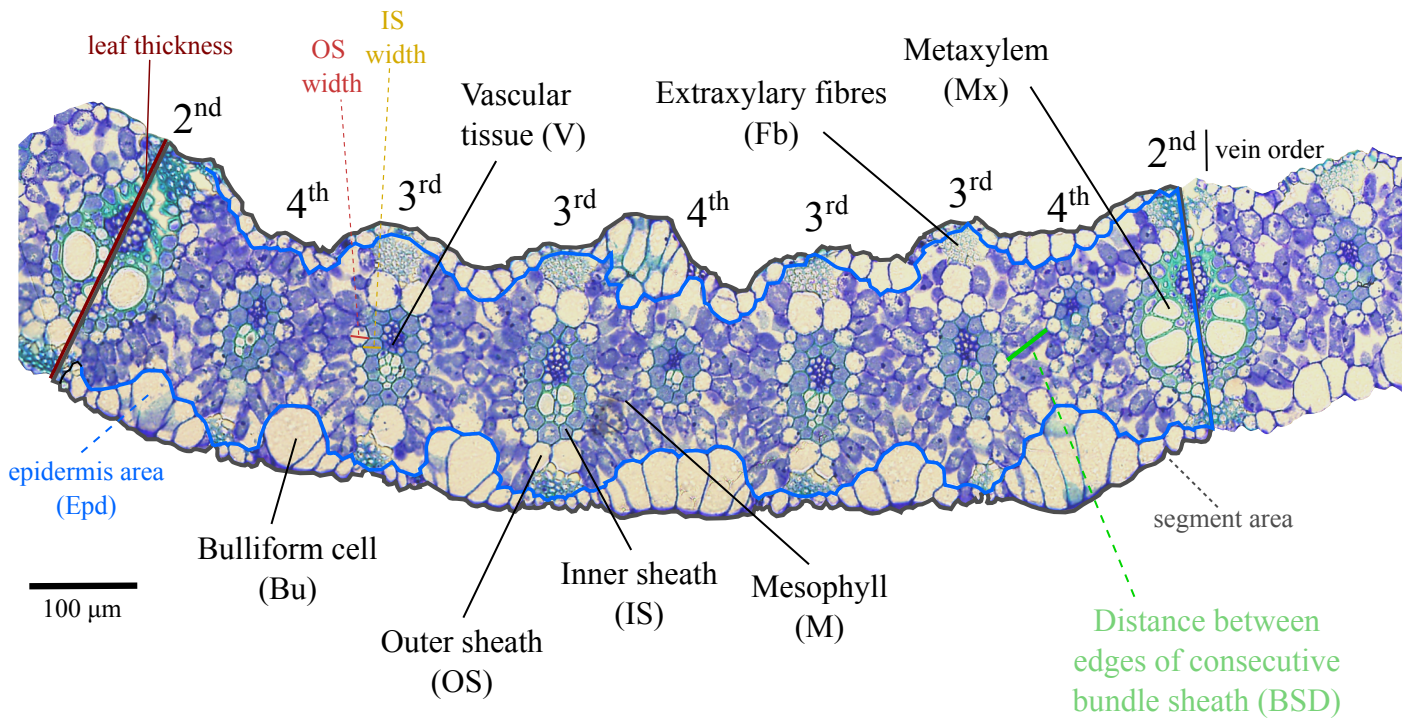

Fig. S1. Leaf anatomical variables measured in this study.

Fig. S2

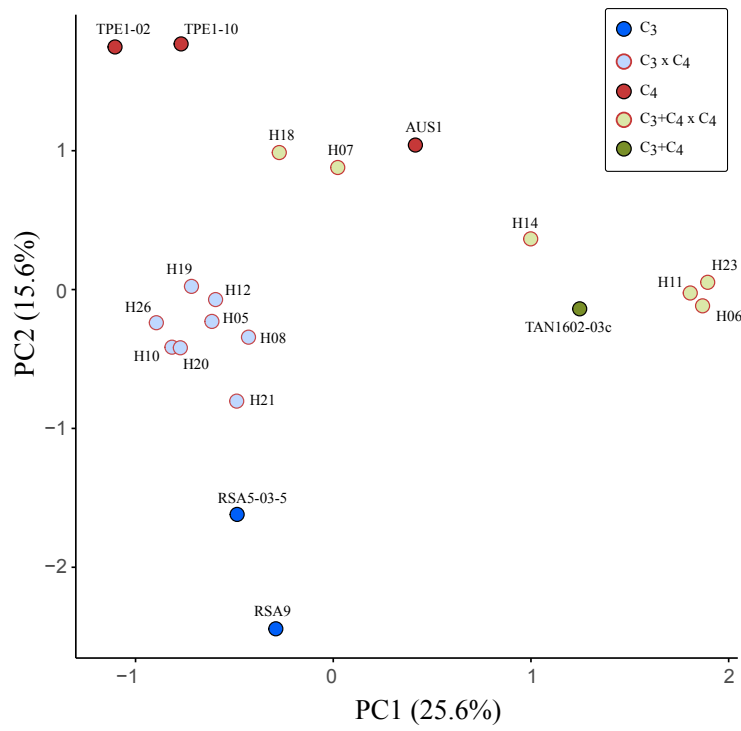

**Fig. S2.** Principal component analysis on 11,988 genes from the chromosome-level genome assembly of *Alloteropsis semialata*.

Fig. S3

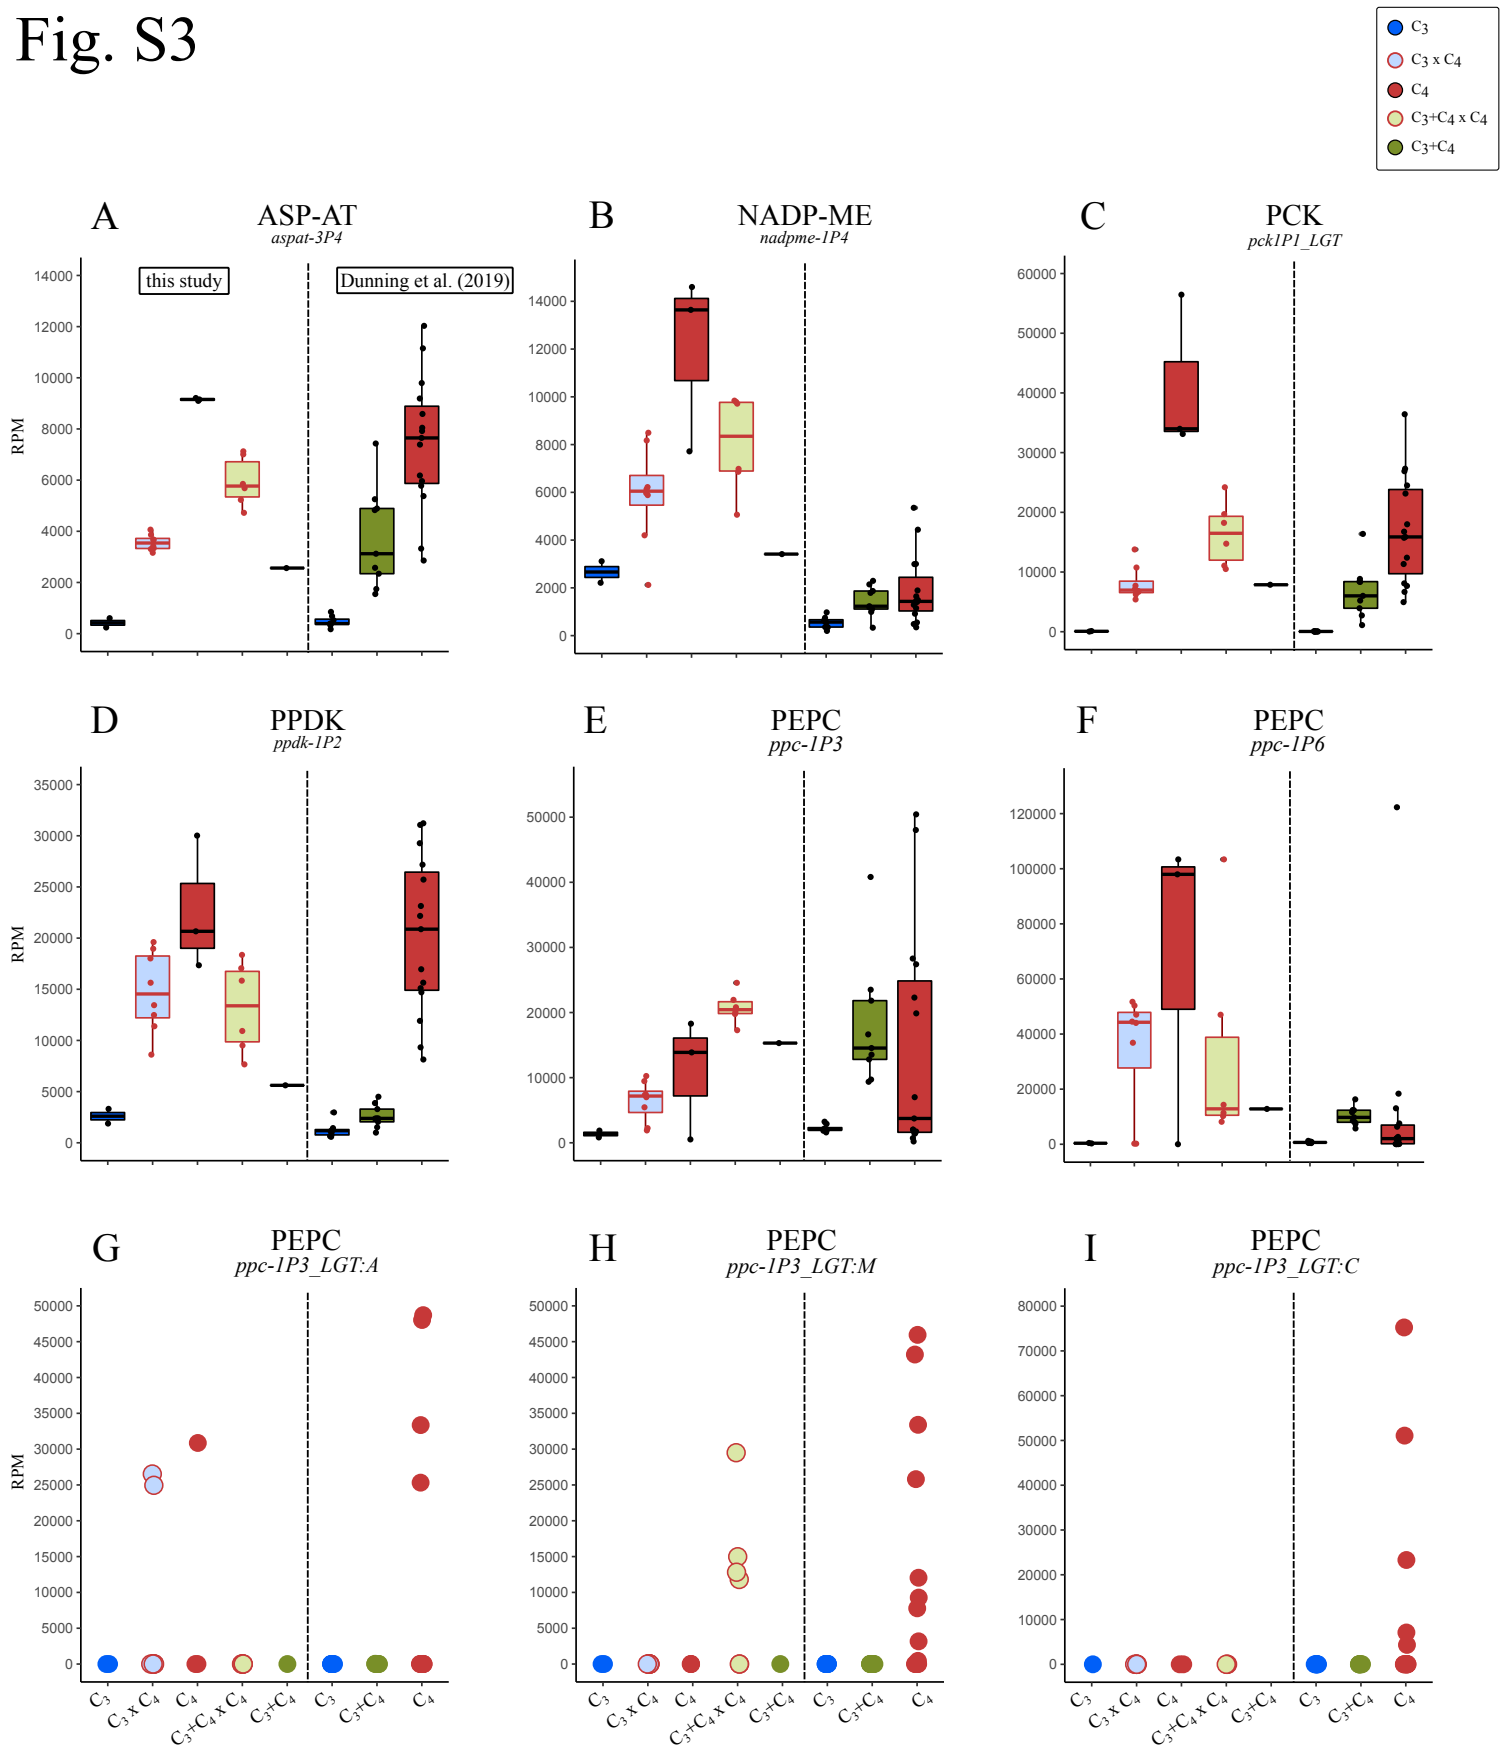

**Fig. S3.** Transcript abundance in reads per million (RPM) of selected genes encoding core C<sub>4</sub> enzymes in *Alloteropsis semialata*: (A) aspartate aminotransferase (ASP-AT, gene *aspat-3P4*), (B) NADP-dependent malic enzyme (NADP-ME, gene *nadpme-1P4*), (C) phosphoenolpyruvate carboxykinase (PCK, gene *pck1P1\_LGT*), (D) pyruvate phosphate dikinase (PPDK, gene *ppdk-1P2*), and (E-I) phosphoenolpyruvate carboxylase (PEPC) genes. Transcript abundance computed for *A. semialata* samples extracted from Dunning et al. (2019a) are shown on the right for each gene.

Fig. S4

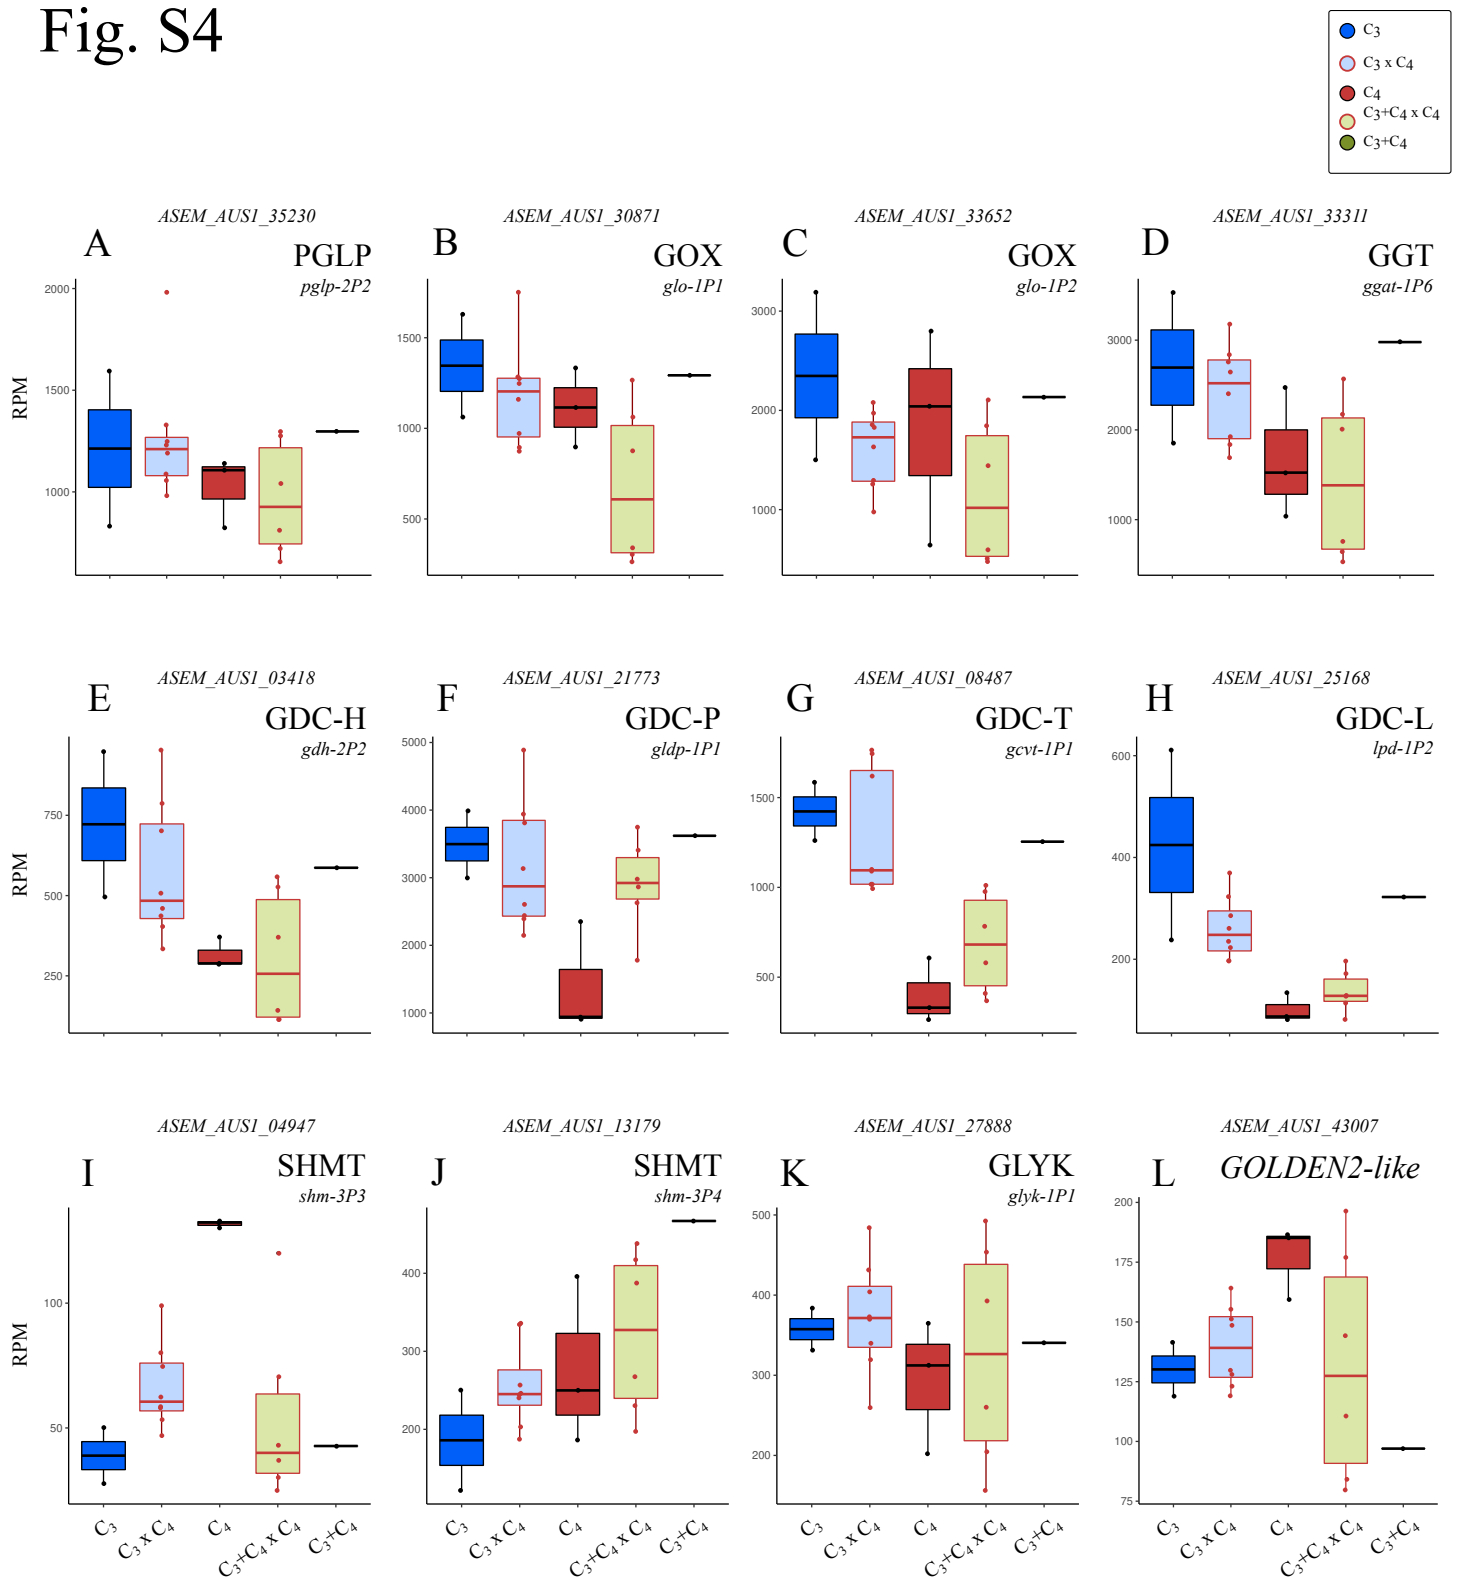

**Fig. S4.** Transcript abundance of selected gene families with a role in photorespiration (A-K), and the gene encoding the transcription factor *GOLDEN2*-like (L) in F1 hybrids and the parental photosynthetic types in *Alloteropsis semialata*. (A) 2-phosphoglycolate (2-PG) phosphatase (PGLP), (B-C) flavin mononucleotide (FMN)-dependent glycolate oxidase (GOX), (D) glutamate:glyoxylate aminotransferase (GGT), (E-H) glycine decarboxylase (GDC) complex proteins -H, -P, -T and -L, (I-J) serine hydroxymethyltransferase (SHMT), (K) glycerate 3-kinase (GLYK). Transcript abundance in reads per million mapped reads (RPM).



Fig. S5

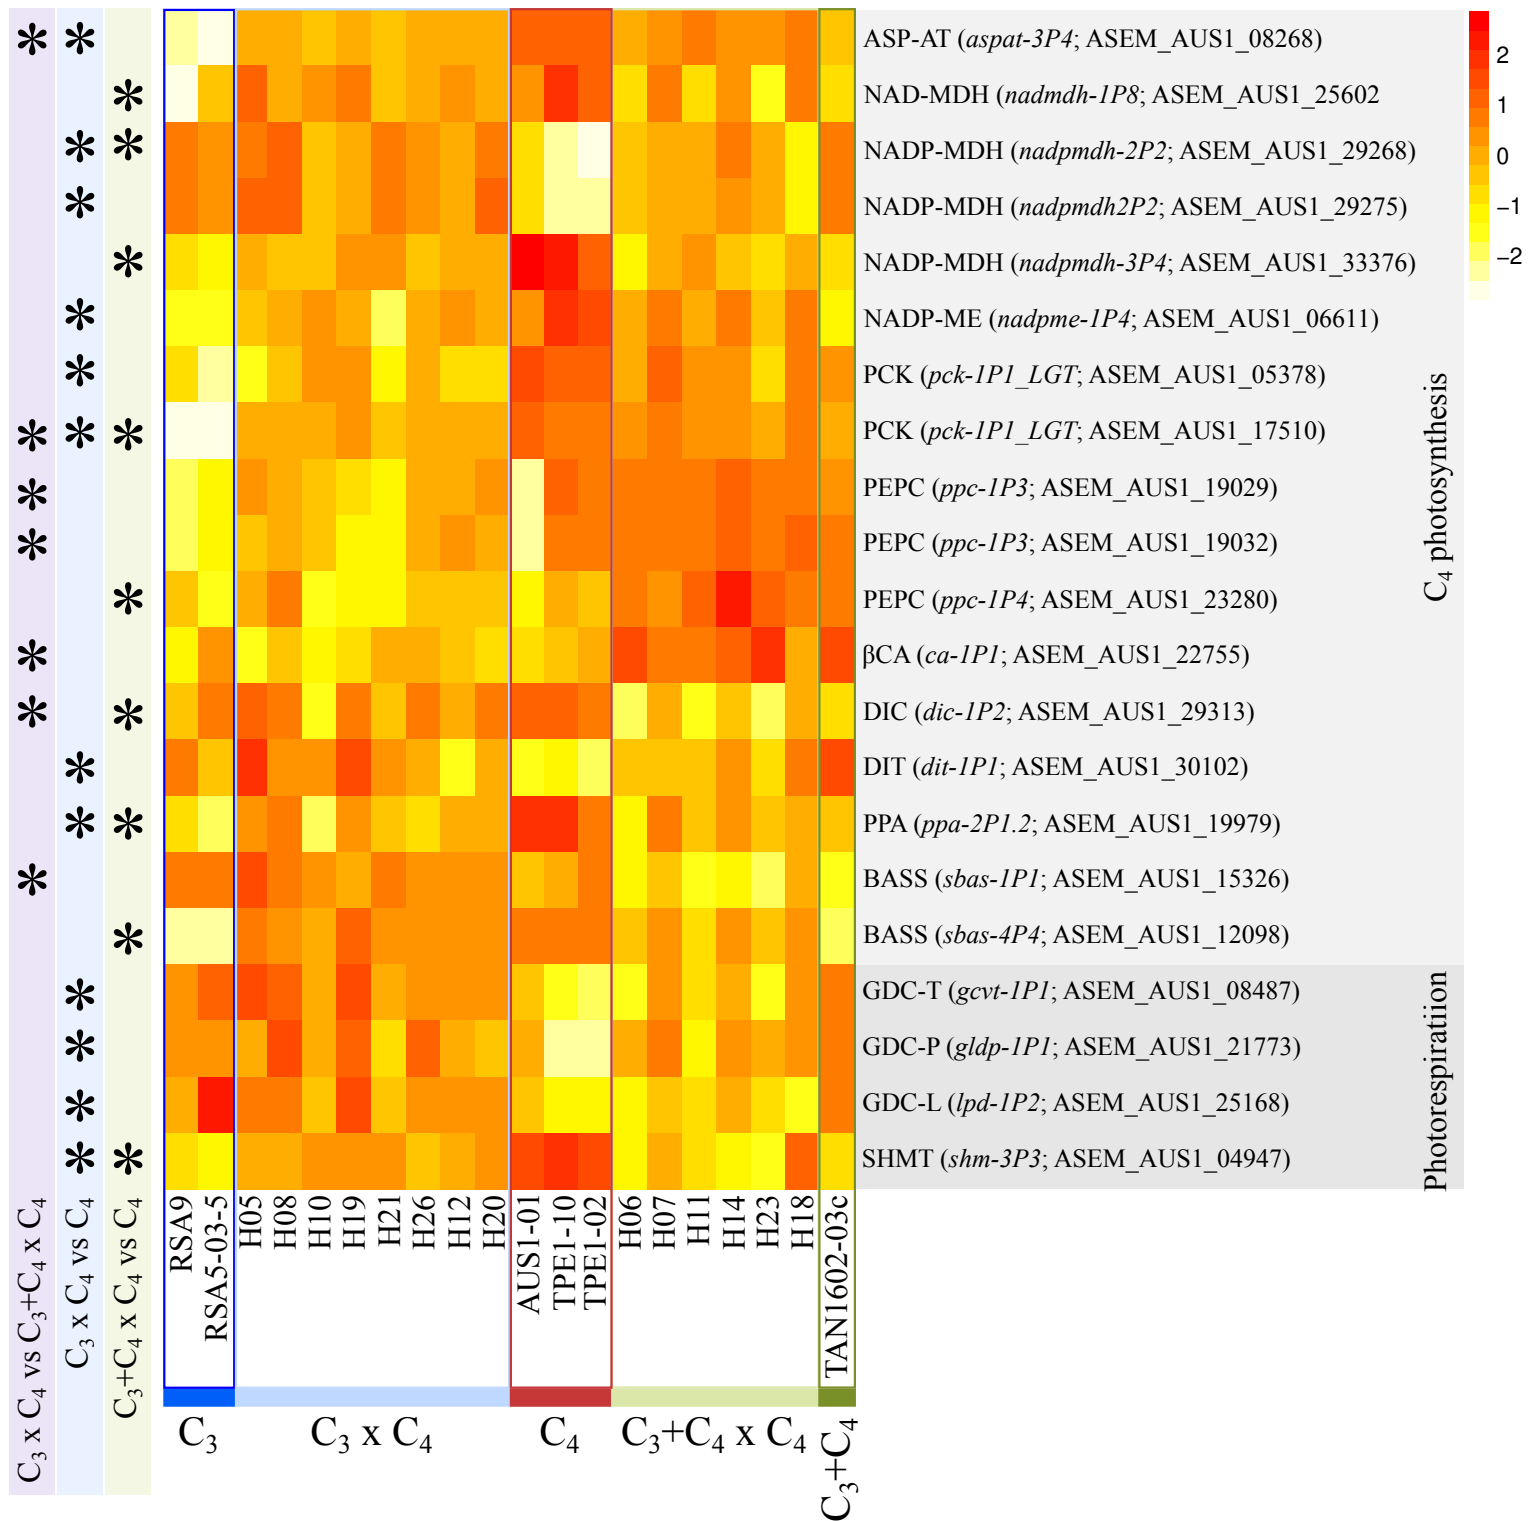

**Fig. S5.** Heat map of differentially expressed genes related to  $C_4$  photosynthesis and photorespiration. Asterisks indicate significant DE genes ( $p < 0.05$ ) for comparisons between hybrid types ( $C_3 \times C_4$  vs  $C_3+C_4 \times C_4$ ) and between each hybrid type and the  $C_4$  type. Only DE genes with at least two-fold change and base count  $> 500$  are shown. Count data was transformed using the VST function of DESeq2 and scaled by row. See table S9 for full gene annotation.

Fig. S6

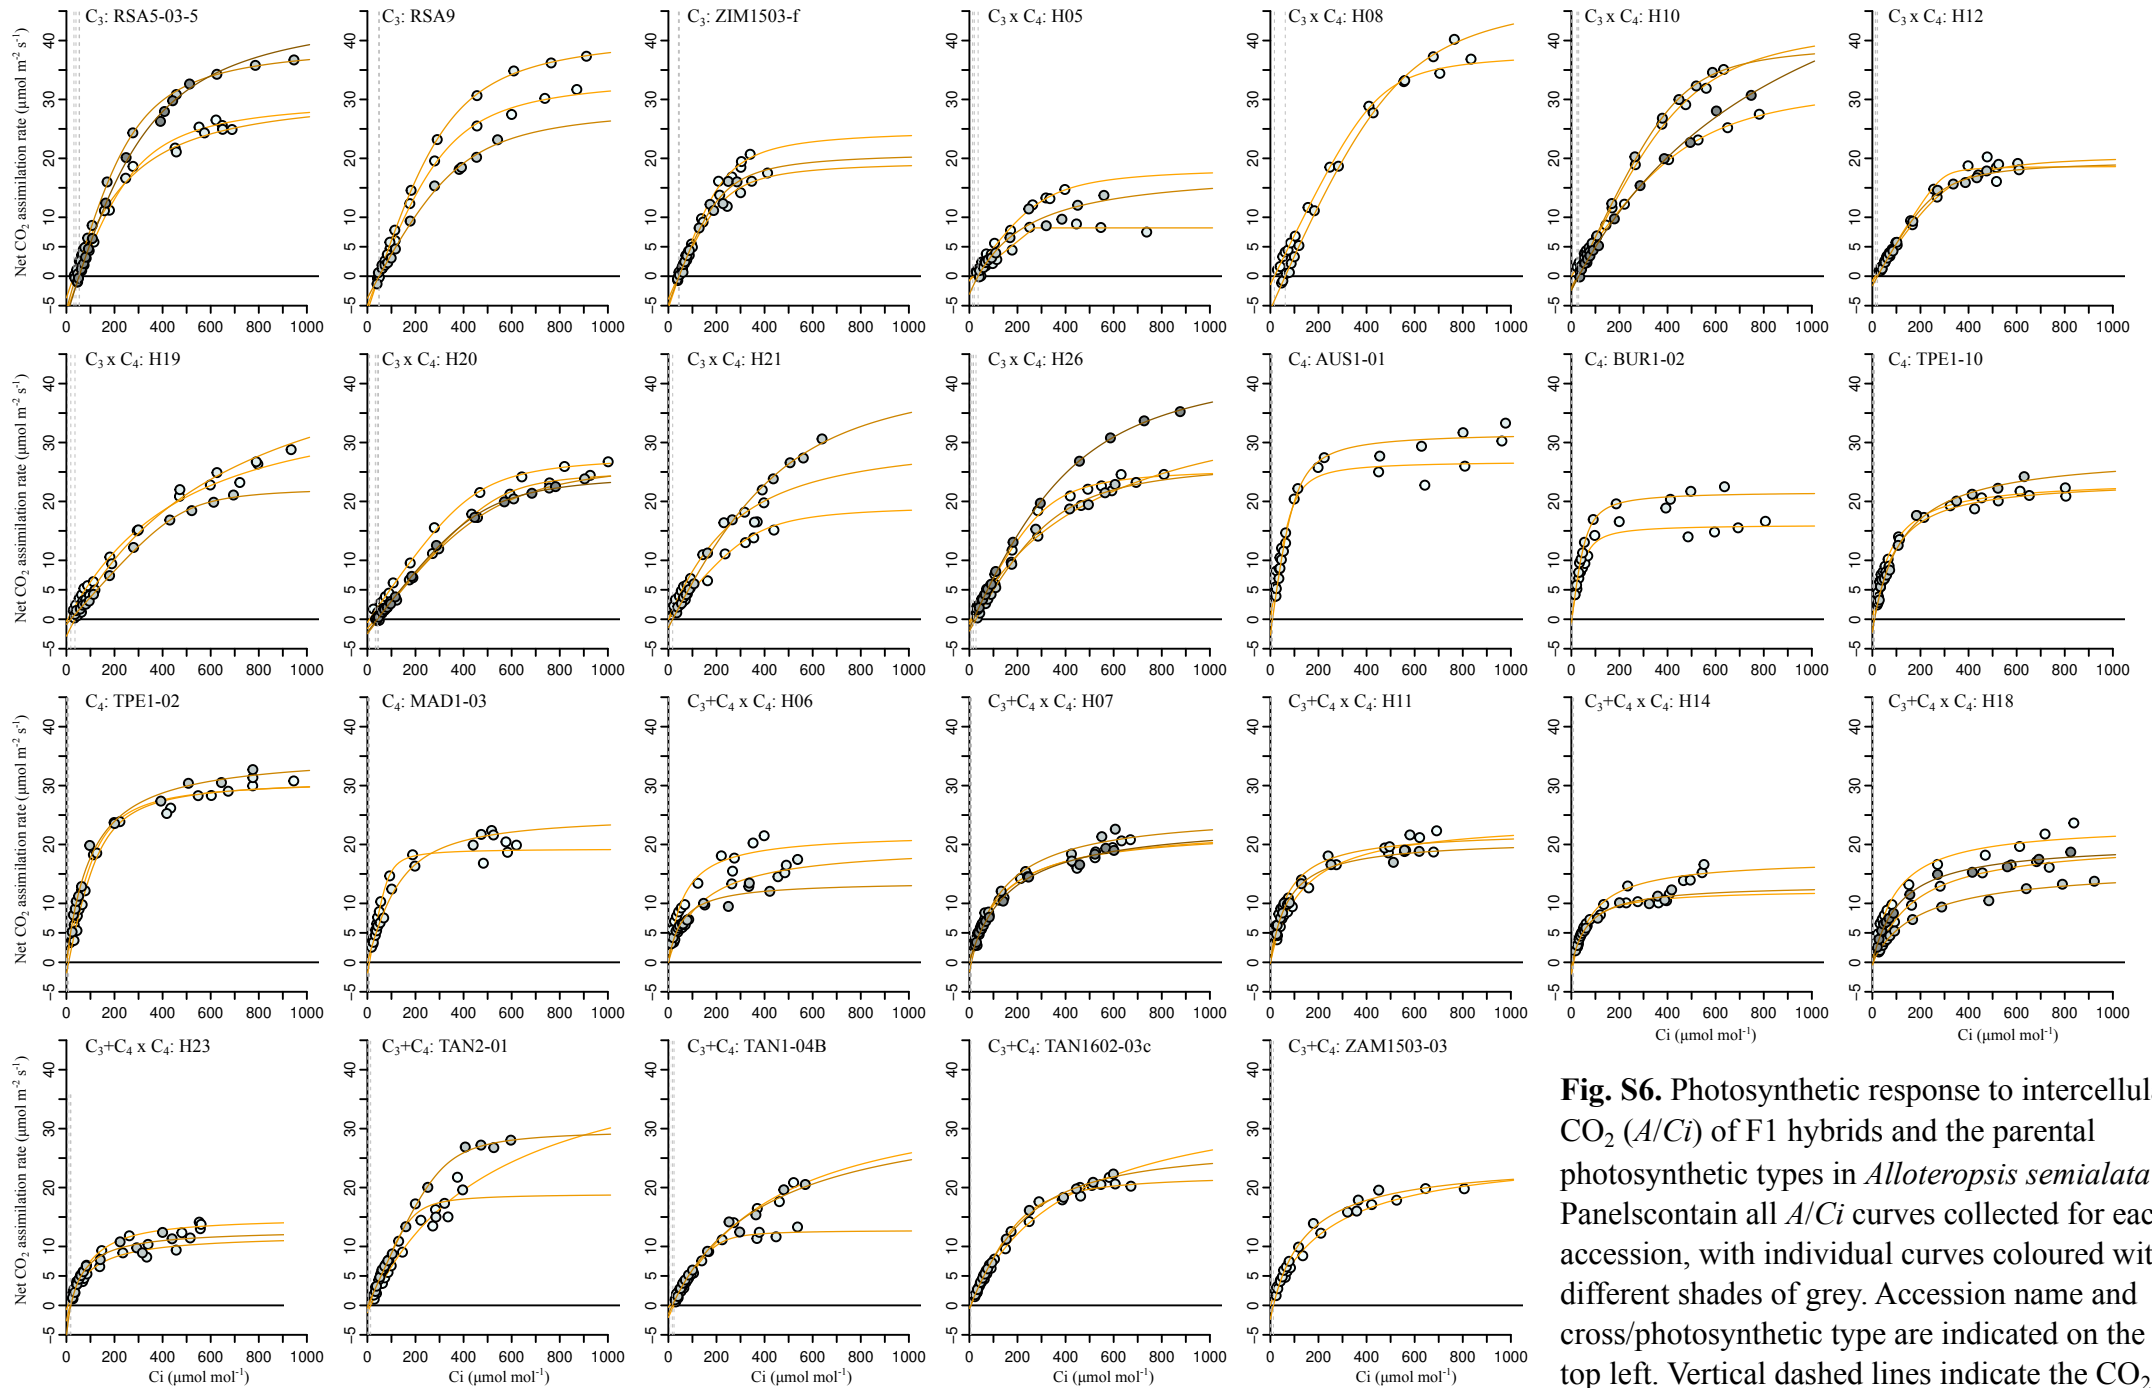

**Fig. S6.** Photosynthetic response to intercellular CO<sub>2</sub> ( $A/C_i$ ) of F1 hybrids and the parental photosynthetic types in *Alloteropsis semialata*. Panels contain all  $A/C_i$  curves collected for each accession, with individual curves coloured with different shades of grey. Accession name and cross/photosynthetic type are indicated on the top left. Vertical dashed lines indicate the CO<sub>2</sub> compensation point of each curve.

Fig. S7

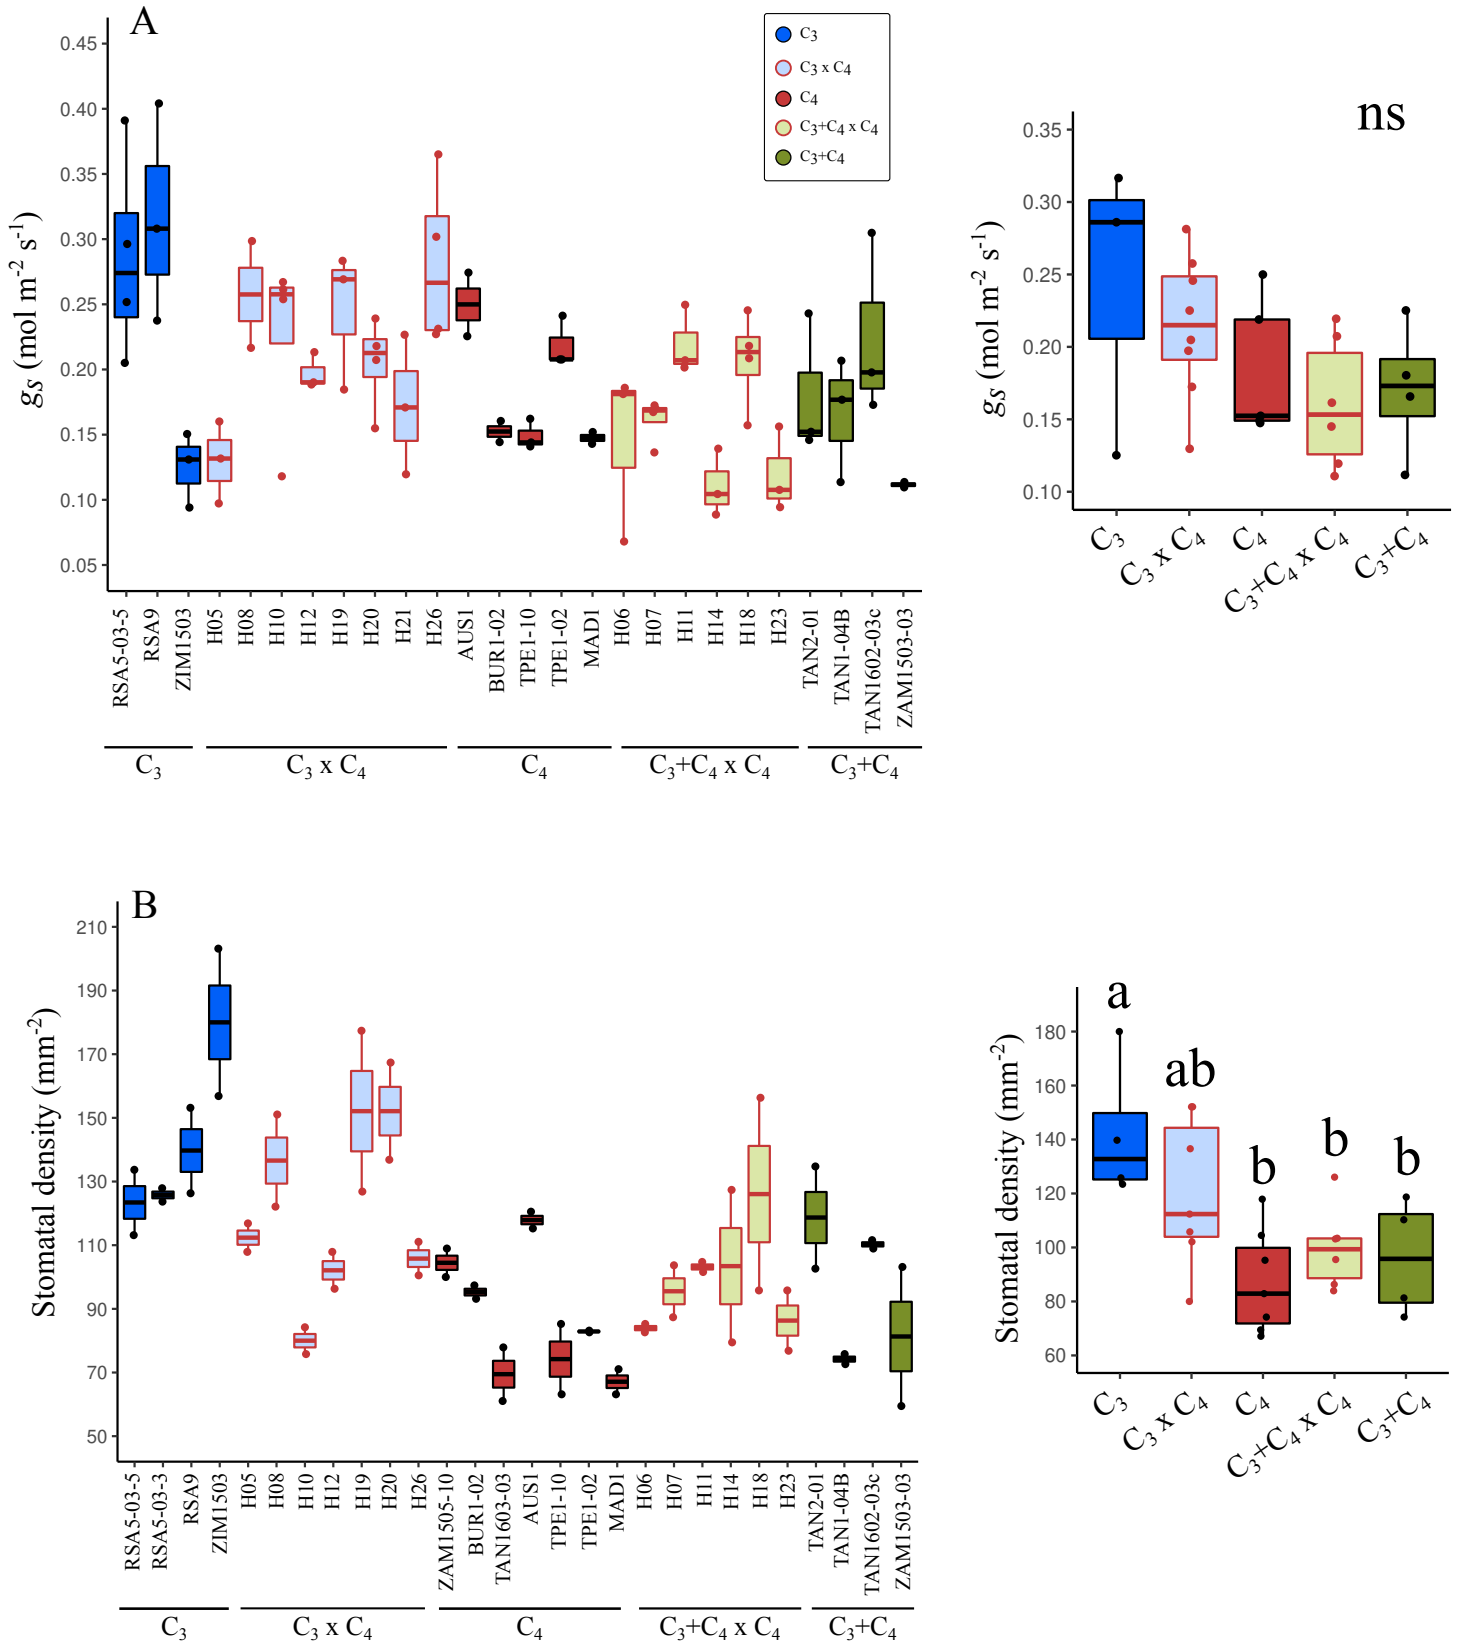

**Fig. S7.** Leaf stomata variables. (A) Steady-state stomatal conductance ( $g_s$ ) at  $400 \mu\text{mol mol}^{-1}$  ( $n = 2-4$  leaves per accession). (B) Stomatal density on the abaxial side of the leaves ( $n = 2$  leaves per accession, with stomata counts averaged from 5 fields per leaf; field area =  $0.38 \text{ mm}^2$ ). Data points on the right are the means per accession within each cross/photosynthetic type, and different lower-case letters indicate statistical differences between groups (ANOVA,  $p < 0.05$  post-hoc Tukey HSD;  $n \geq 3$ ).

Fig. S8

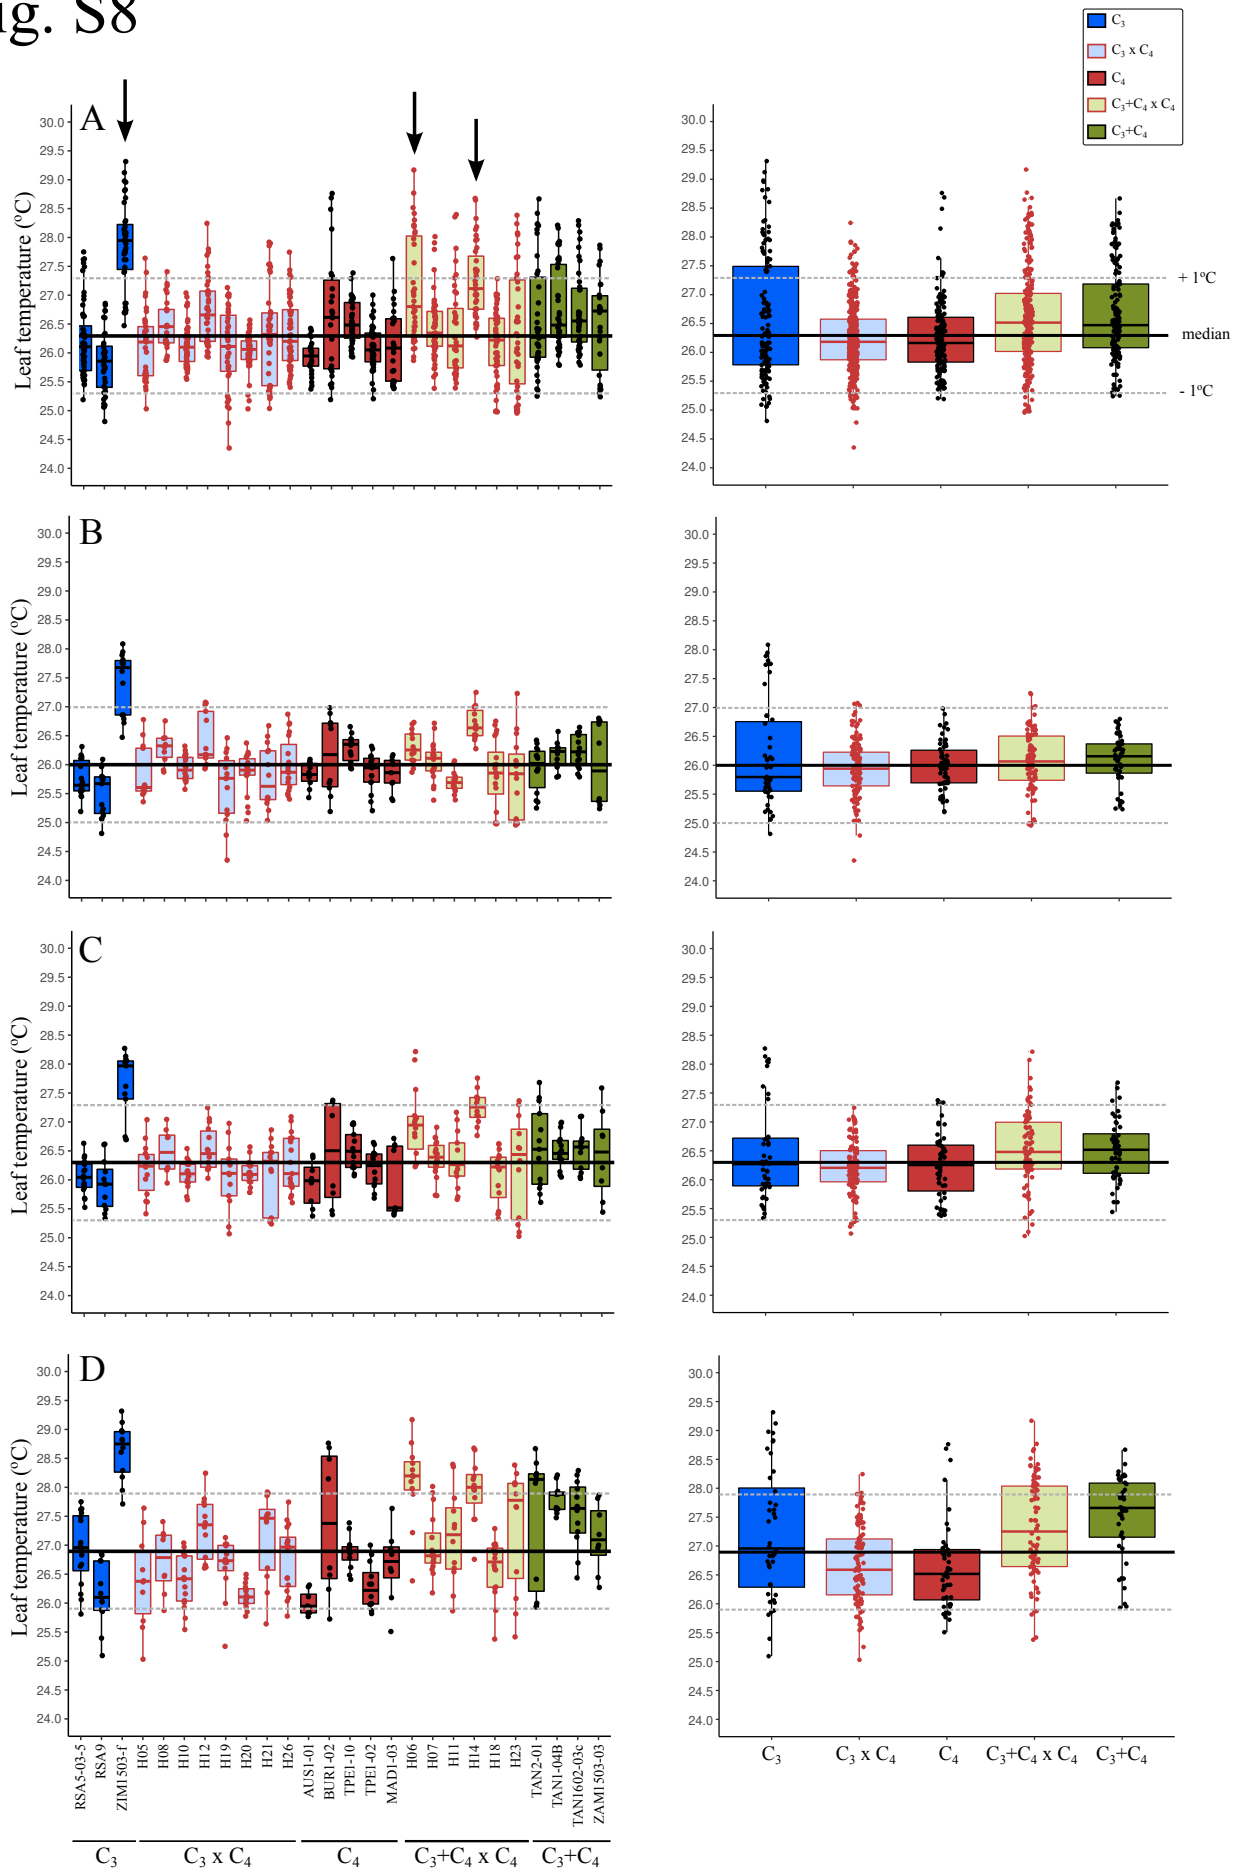

**Fig. S8.** Leaf temperature variation during A/Ci curves. Data points are individual A/Ci measurements for each plant (left panels) or with individuals grouped into cross/photosynthetic types (right panels). (A) All measurements, and measurements collected at reference CO<sub>2</sub> (B) < 100 μmol mol<sup>-1</sup>, (C) between 100 and 400 μmol mol<sup>-1</sup>, and (D) > 400 μmol mol<sup>-1</sup>. Arrows indicate outlier individuals that were removed for the analysis in Fig. S9.

Fig. S9

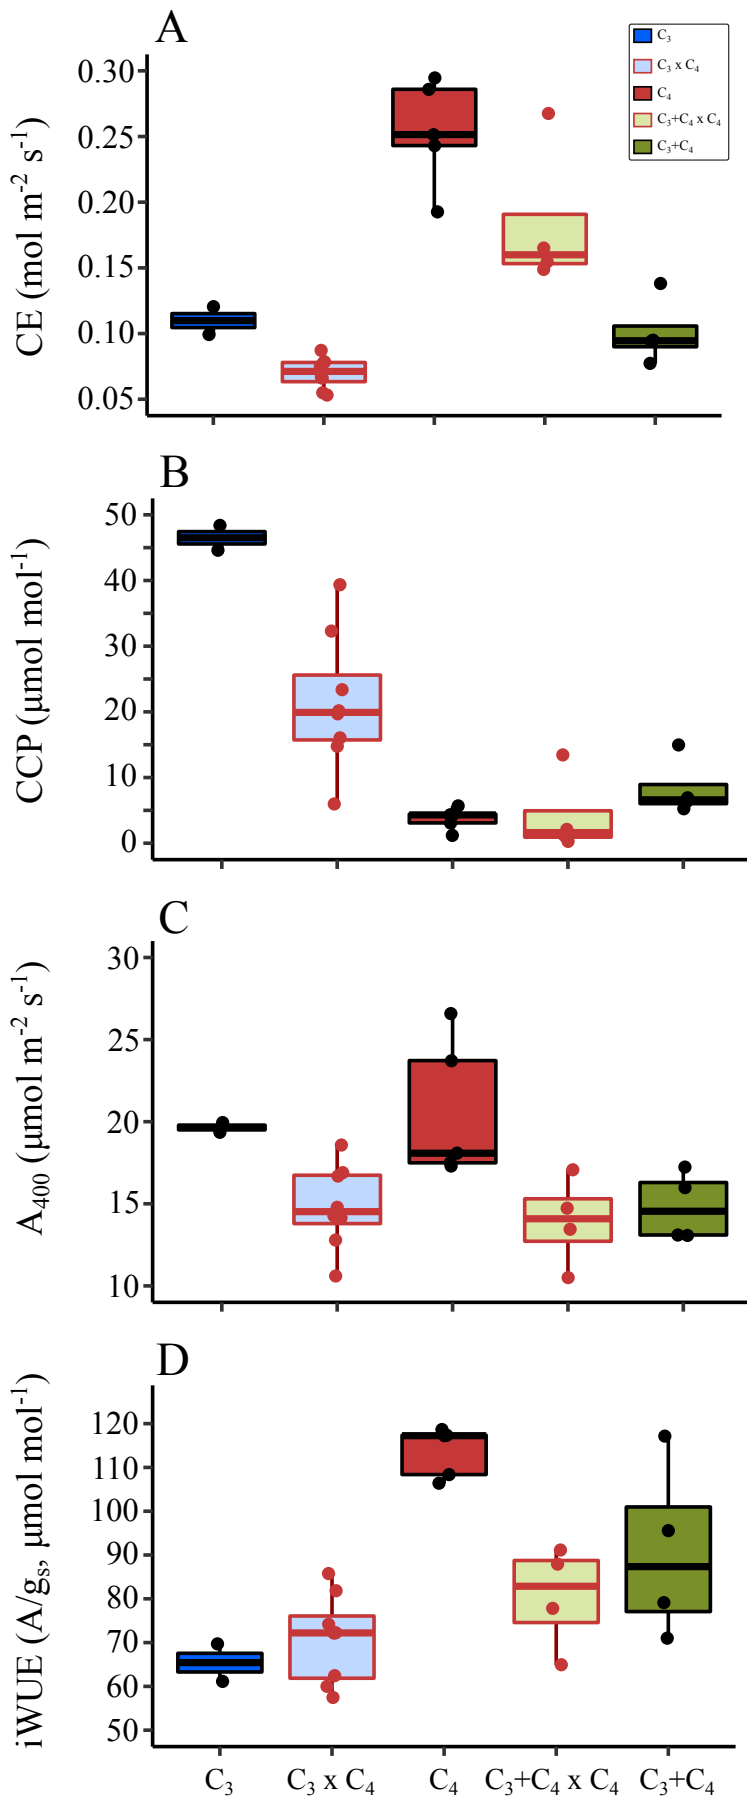

**Fig. S9.** Photosynthetic performance of F1 hybrids and the parental photosynthetic types in *Alloteropsis semialata* after removing outlier accessions (i.e. with  $T_{\text{leaf}} 1^{\circ}\text{C}$  above the median). (A) Maximum carboxylation efficiency (CE), (B) CO<sub>2</sub> compensation point (CCP), and steady-state (C) net photosynthetic rate (A<sub>400</sub>), and (D) intrinsic water use efficiency (iWUE,  $A/g_s$ ) at reference CO<sub>2</sub> = 400 μmol mol<sup>-1</sup>.
